# Supplementary material
Source: publisher figshare collection journal article supplement (https://acs.figshare.com/ndownloader/files/16338959)
Supplement: Supplementary file 1 [file 16338959]

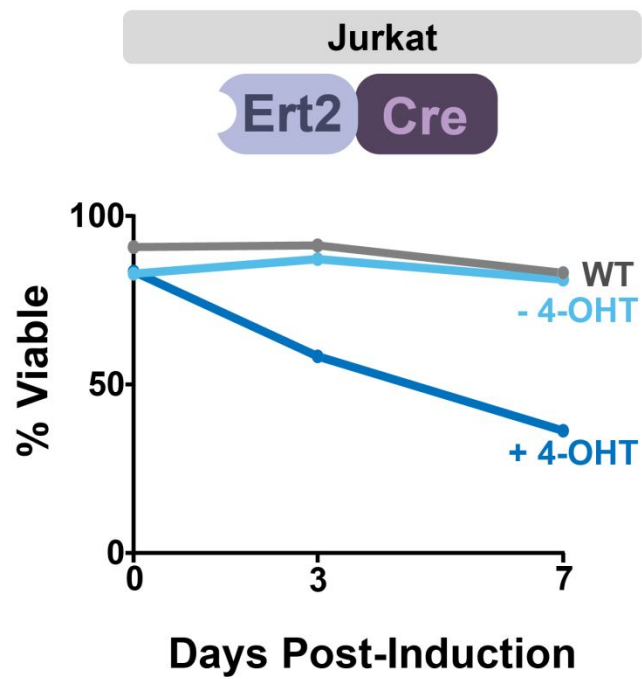

**Supplemental Figure 1: Cre activation is toxic to Jurkat T cells.** Induction of CreER<sup>T2</sup> activity with 1  $\mu$ M 4-OHT led to reduction in viability. A single sample was obtained from each induced or non-induced culture.

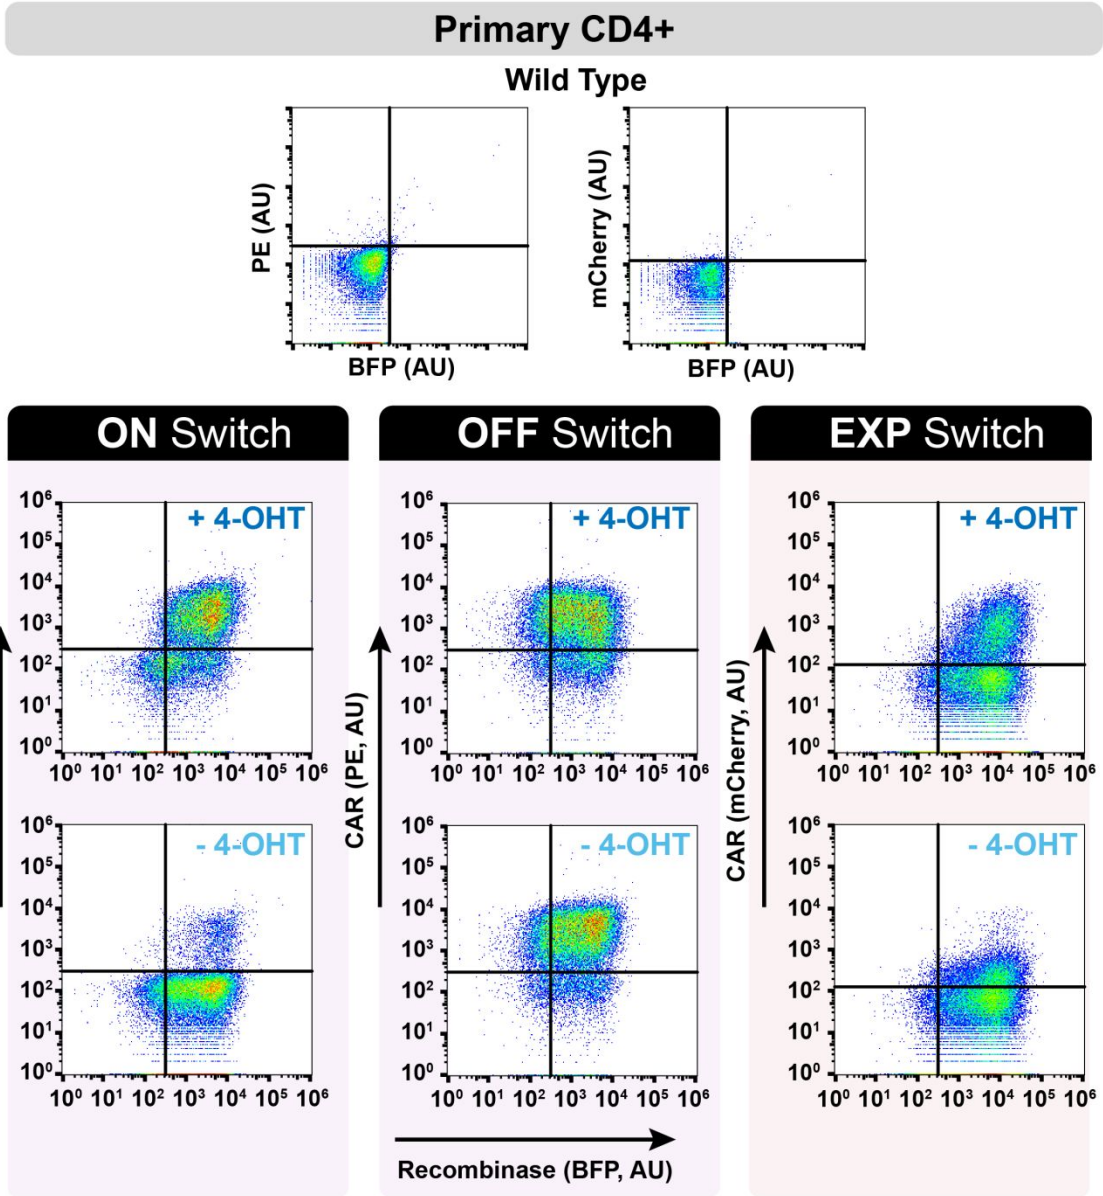

**Supplemental Figure 2: Basal FlpO activity is correlated with FlpO expression level in primary T cells.** At high BFP level, which is correlated to FlpOER<sup>T2</sup> expression, FlpO activity is observed without 4-OHT. This effect is most prominent for the ON switch. Data is representative of one sample from each culture, 1 day post-induction. ON and OFF Switch cells control expression of  $\alpha$ Her2-B1D2-CAR, and EXP Switch cells control expression  $\alpha$ Her2-C65-CAR. Induction was performed with 1  $\mu$ M 4-OHT.

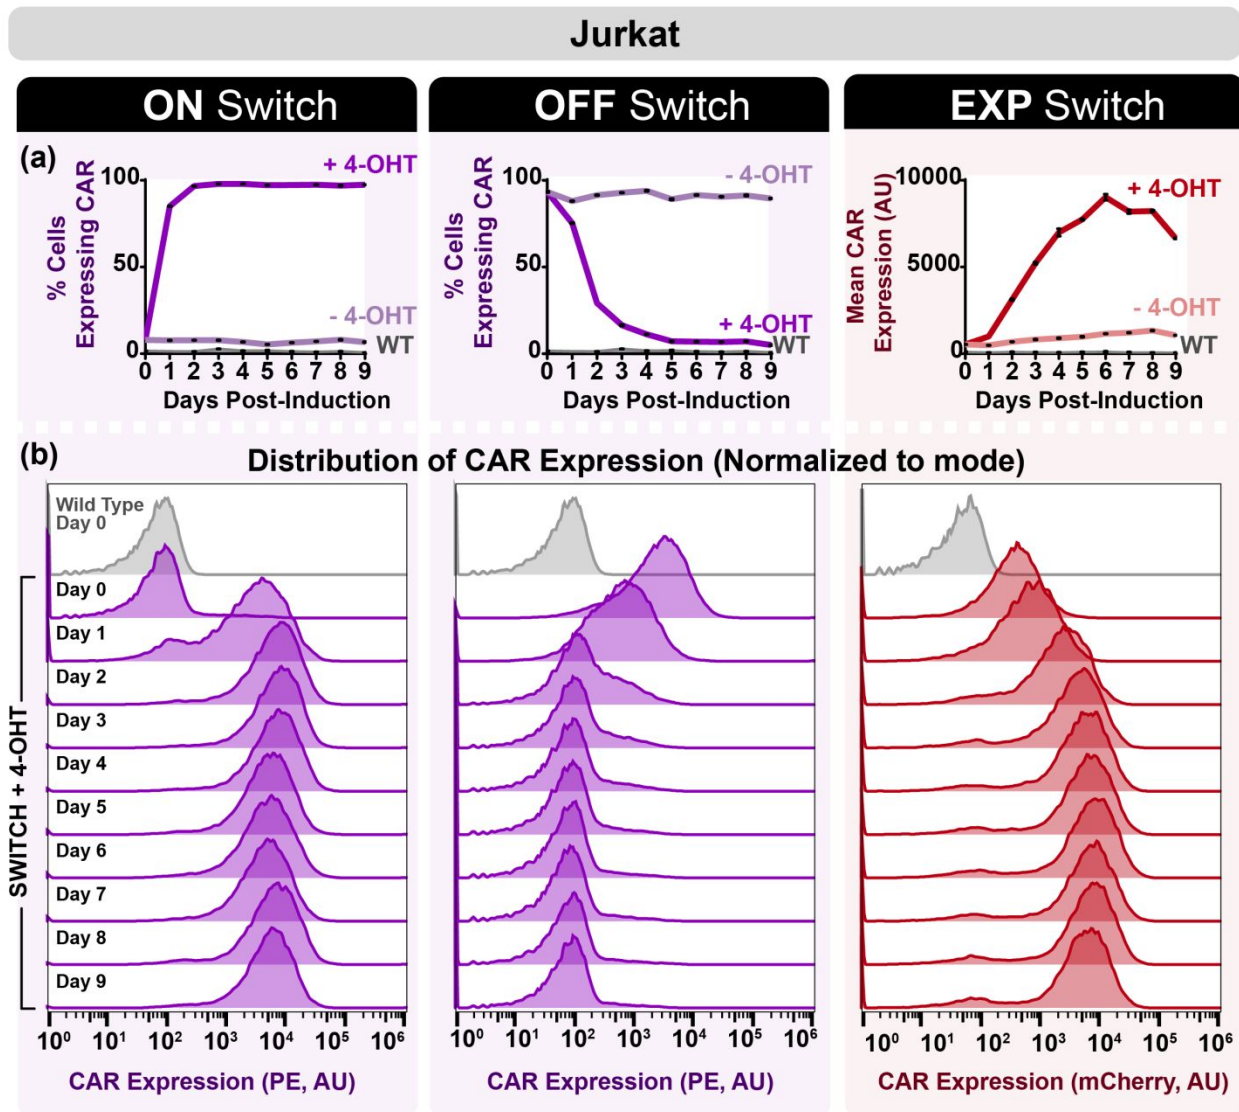

**Supplemental Figure 3: CAR expression kinetics for the ON, OFF, and EXP switch in Jurkat T cells** (a) Time course data for the recombinase switches with or without drug addition (1  $\mu$ M 4OHT). Samples were obtained in triplicate from each induced or non-induced culture and then plotted as mean and standard deviation. The ON and OFF switches are presented as percent cell expressing the  $\alpha$ Her2-C65-CAR. The EXP switch is presented as the mean  $\alpha$ Her2-G98-CAR expression level in arbitrary units (AU). For all circuits, CAR expression in + 4-OHT cells was significantly different from – 4-OHT cells starting one day post-induction (unpaired two-tailed T-test with Holm-Sidak adjustment,  $p < 0.0001$ ). (b) Change in distribution of CAR expression level (AU) in recombinase-positive cells days following 4-OHT induction.

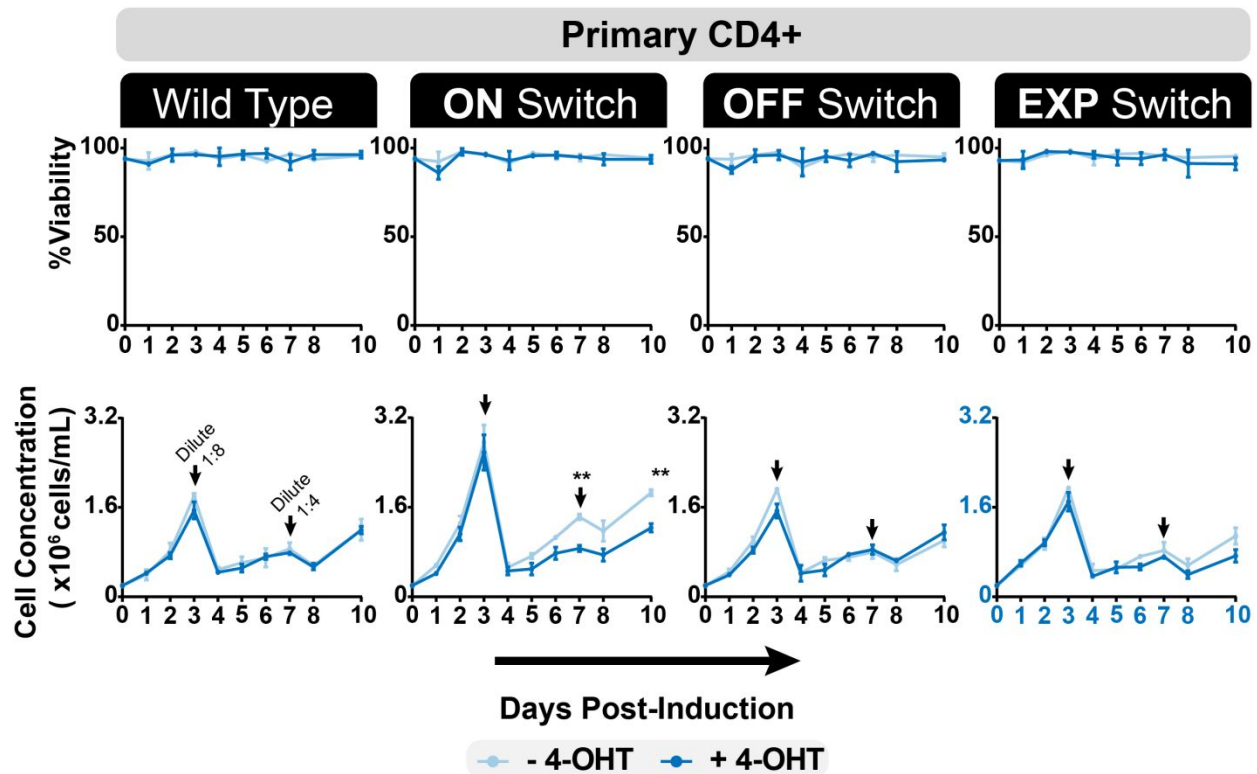

**Supplemental Figure 4: Primary CD4<sup>+</sup> T cells with active FlpO have the same viability as wild type T cells without any Flp expression.** Percentage of viable cells (*Top panel*) and cell concentration (*Bottom Panel*) as a function of time with or without 1  $\mu$ M 4-OHT addition. Samples were obtained in triplicate from each induced or non-induced culture and then plotted as mean and standard deviation. Significant differences in viability and cell concentration for + 4-OHT cells compared to - 4-OHT cells determined by unpaired, two-tailed T test with Holm-Sidak adjustment (\*\*  $p < 0.01$ ).



## Jurkat

(a)

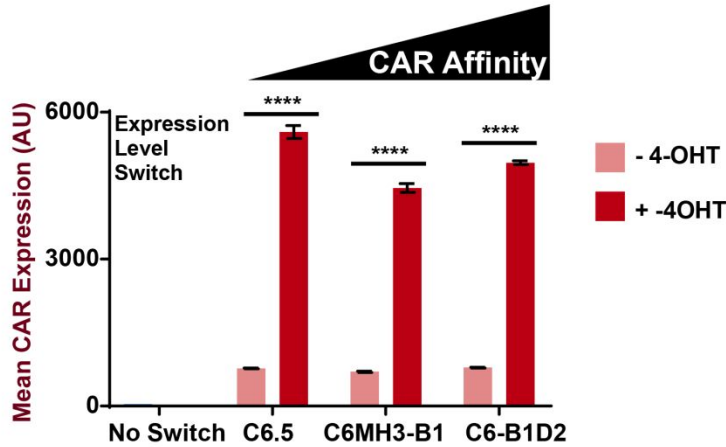

(b)

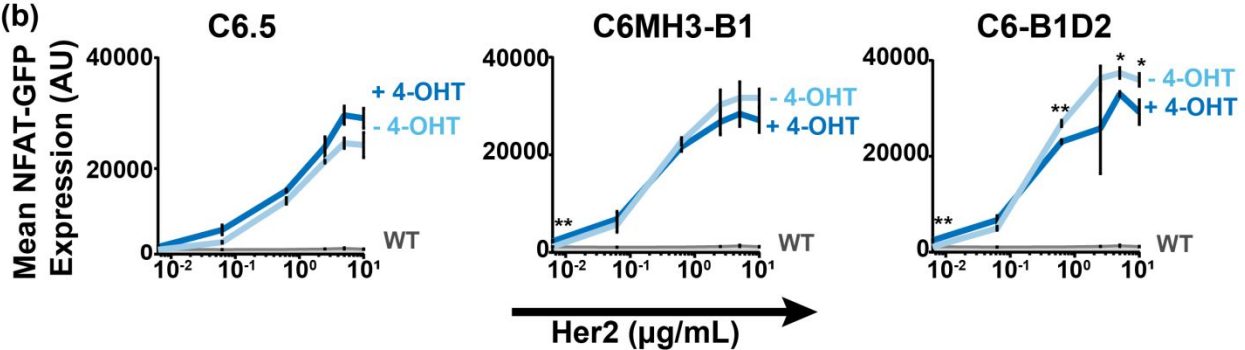

### Supplemental Figure 5: EXP level switch did not lead to reduced change in CAR activity for $\alpha\text{Her2}$ -CARs with higher scFv antigen affinity 5 days post-induction.

(a) The addition of 1  $\mu\text{M}$  4-OHT corresponded an increase of CAR expression in Jurkat T cells. Samples were obtained in triplicate from each induced or non-induced culture and then plotted as mean and standard deviation. (b) CAR activity was quantified using the NFAT-GFP transcription reporter in Jurkat T cell. Cells were plated against Her2 antigen in triplicate and plotted as mean and standard deviation. Significant difference of CAR expression and NFAT-GFP activity in + 4-OHT cells compared to - 4-OHT cells determined by unpaired two-tailed T test (\*  $p < 0.05$ , \*\*  $p < 0.01$ , \*\*\*\*  $p < 0.001$ ), and the Holm-Sidak adjustment was applied for comparison of NFAT-GFP activity.

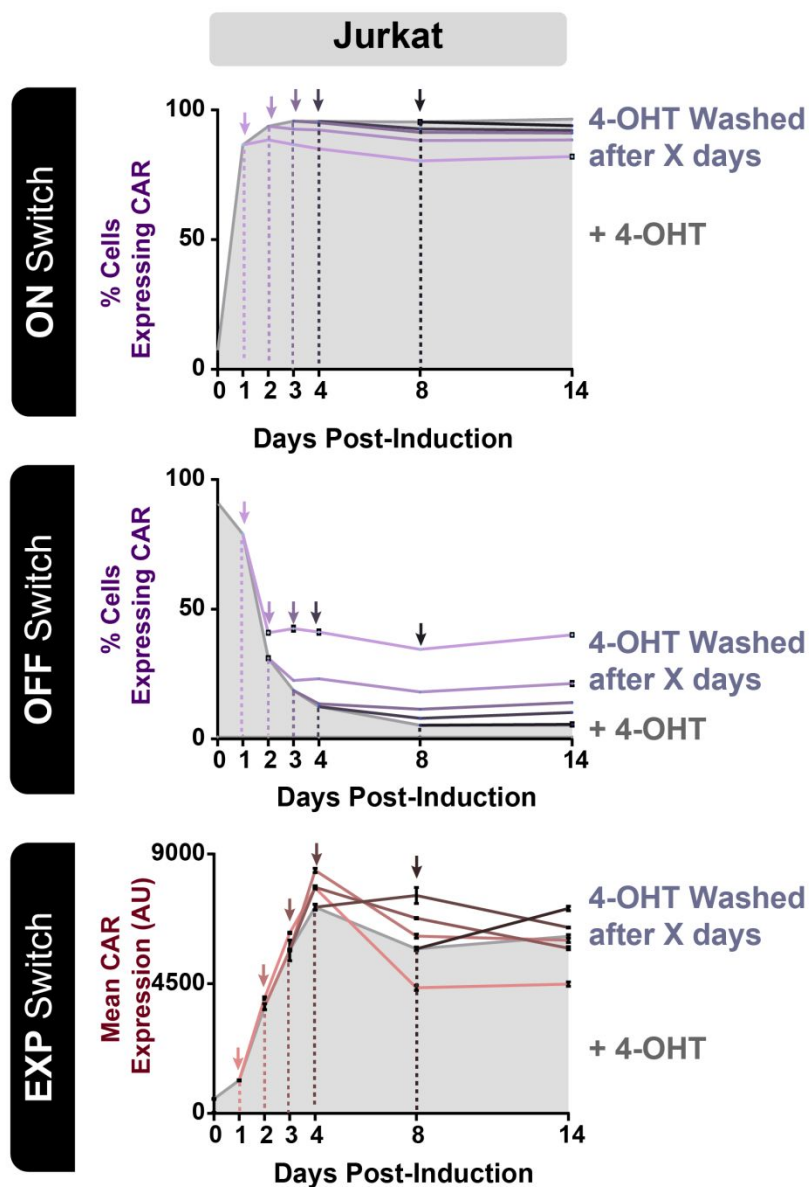

**Supplemental Figure 6: CAR expression level in the OFF switch can be stably regulated by the duration of 4-OHT exposure in OFF Switch Jurkat T cells, but not ON or EXP Switch Jurkat T cells.** Time course of switches over induction. The arrows indicate the different times when 4-OHT (1  $\mu$ M) was washed away from the sample. The ON and OFF switches are presented as percent cell expressing the  $\alpha$ Her2-C65-CAR. The EXP switch is presented as the mean  $\alpha$ Her2-G98-CAR expression level in arbitrary units (AU). Samples were obtained in triplicate from each induced or non-induced culture and then plotted as mean and standard deviation. EXP switch representative of 1 of 2 repeats.
